# Supplementary material for: Computational Imaging for Simultaneous Image Restoration and Super-Resolution Image Reconstruction of Single-Lens Diffractive Optical System
Source: MDPI journal article supplement (doi:10.3390/app12094753), 2022-05-09
Supplement: s1 [file s1]

Archive with 1 entries (1 files):
- applsci-1695371-SI.pdf
